# Supplementary material for: Obesity and Type 2 Diabetes mellitus induce lipopolysaccharide tolerance in rat neutrophils
Source: PubMed Central journal article supplement (PMC6277411; doi:10.1038/s41598-018-35809-2), 2018-12-03

# **Obesity and Type 2 Diabetes mellitus induce lipopolysaccharide tolerance in rat neutrophils.**

Wilson Mitsuo Tatagiba Kuwabara<sup>\*1</sup>; Caroline Naomi Fukusawa Yokota<sup>1</sup>; Rui Curi<sup>1,2</sup>; Tatiana Carolina Alba Loureiro<sup>1</sup>

<sup>1</sup>Department of Physiology and Biophysics

Institute of Biomedical Sciences

University of São Paulo, São Paulo, Brazil.

<sup>2</sup>Cruzeiro do Sul University, São Paulo.

Interdisciplinary Health Science Post-Graduate Program

\* Corresponding author:

Wilson Mitsuo Tatagiba Kuwabara

Department of Physiology and Biophysics

1524 Professor Lineu Prestes Avenue, ICB1, 115

University of São Paulo

São Paulo-SP, Brazil

E-mail: wilsonk@icb.usp.br

Phone: +55 11 941422841

+55 11 30917739

Figure S1

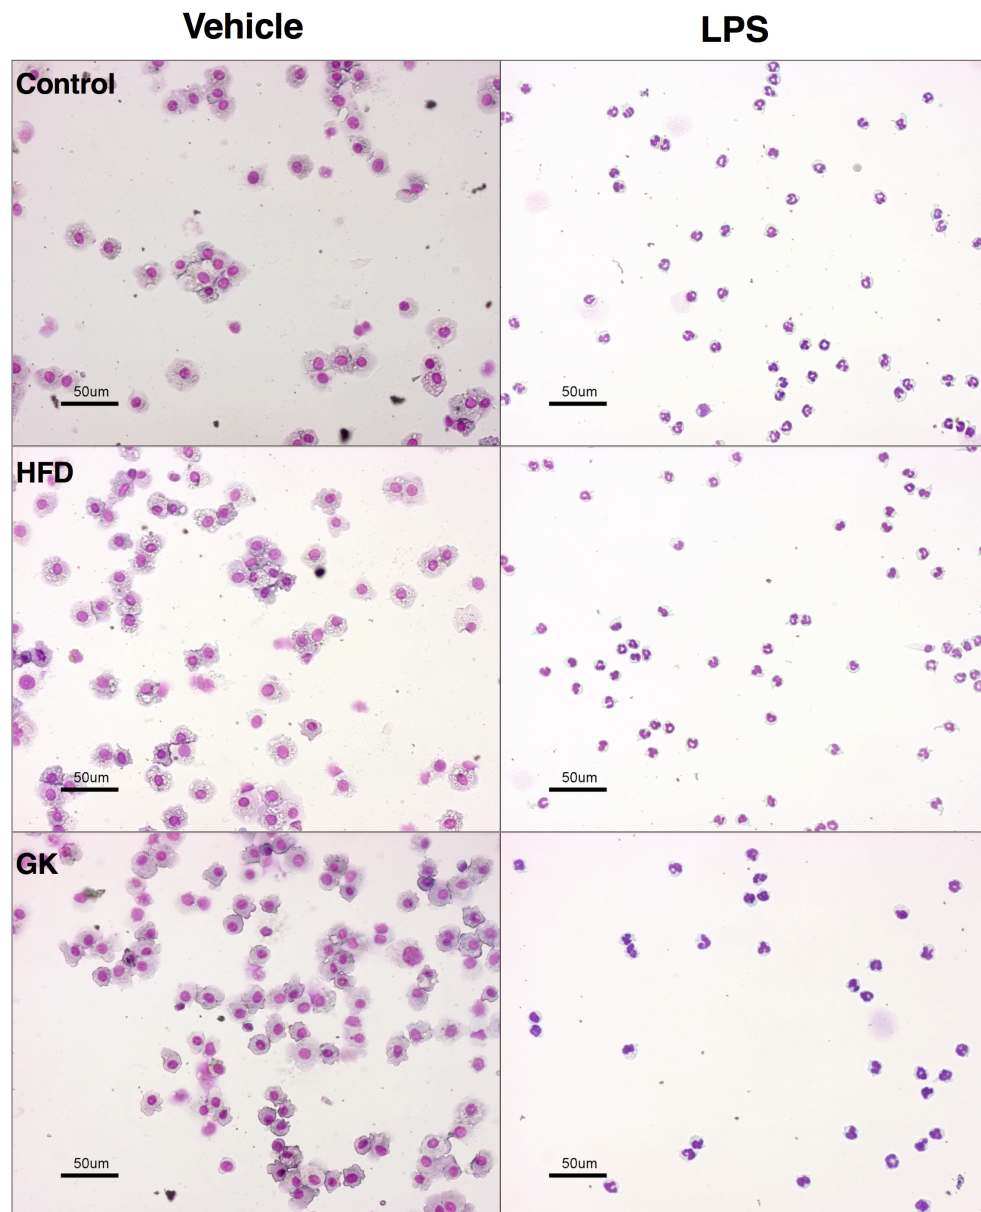

**Figure S1. Cells collected from bronchoalveolar lavage (BAL) after vehicle or LPS intratracheal instillation.** After 6 hours of vehicle instillation only macrophages were collected from the BAL of all studied groups. LPS stimulus for 6h promoted neutrophil infiltration. Cells were stained with a hematology staining kit. Control (n=6); HFD (n=6) and GK (n=6).

**Table S1. Primers sequences, Nm and product length of the genes analyzed.****Table S1**

| <b>Gene</b>                    | <b>Primers</b>                                         | <b>Nm</b>   | <b>Product length</b> |
|--------------------------------|--------------------------------------------------------|-------------|-----------------------|
| <b>IL-1<math>\beta</math></b>  | S: AAATGCCTCGTGCTGTCTGA<br>AS: AGGCCACAGGGATTTTGTCTG   | NM_031512.2 | 133 bp                |
| <b>IL-6</b>                    | S: AGAGACTTCCAGCCAGTTGC<br>AS: AGTCTCCTCTCCGGACTTGT    | NM_012589.2 | 85 bp                 |
| <b>IL-18</b>                   | S: AACCGCAGTAATACGGAGCAT<br>AS: CGTTGGCTGTTCCGGTTCGATA | NM_019165.1 | 101 bp                |
| <b>IL-10</b>                   | S: CCTCTGGATACAGCTGCGAC<br>AS: ATGGCCTTGTAGACACCTTTGT  | NM_012854.2 | 120 bp                |
| <b>TNF-<math>\alpha</math></b> | S: CTGTGCCTCAGCCTCTTCTC<br>AS: ACTGATGAGAGGGGAGCCCAT   | NM_012675.3 | 126 bp                |
| <b>CXCL-1</b>                  | S: CCACACTCAAGAATGGTTCGC<br>AS: ACTTGGGGACACCCTTTAGC   | NM_030845.1 | 93 bp                 |
| <b>CXCL-2</b>                  | S: CACCAACCATCAGGGTACAGG<br>AS: TTGGTAGGGTCGTCAGGCA    | NM_053647.1 | 71 bp                 |
| <b>CXCL-3</b>                  | S:AGCCACTCTCAAGGATGGTCAA<br>AS: ACAGGGAGGGGCTCTTCAGTA  | NM_138522.1 | 95 bp                 |
| <b>LFA-1</b>                   | S: ATCGCACACACATGGACTGT<br>AS: GCTTCCCTGGTTGGCTTCTT    | NM_01033998 | 80 bp                 |
| <b>ICAM-1</b>                  | S: GCCTGGGGTTGGAGACTAAC<br>AS: CTGTCTTCCCAATGTCGCT     | NM_012967.1 | 91 bp                 |
| <b>ICAM-2</b>                  | S: ATGAGCCTCCAGCTCAGGTA<br>AS: AGAGCAGAGAGAGGGGTGAGG   | NM_10077251 | 126 bp                |
| <b>Itgb2</b>                   | S: GTTTCAGACAGAGGTCGGCA<br>AS: AATTTCTCCGGACAGGCAG     | NM_10377802 | 103 bp                |
| <b>TLR4</b>                    | S: TCCACAAGAGCCGAAAGTT<br>AS: TGAAGATGATGCCAGAGCGG     | NM_019178.1 | 126 bp                |
| <b>TLR2</b>                    | S: ATCACTGCACCCTCAATGGG<br>AS: TGTGCAGGCTCCGTATTGTT    | NM_198769.2 | 102 bp                |
| <b>MyD88</b>                   | S: GAGAGCAGTGTCCCACAGAC<br>AS: AGCAGATGAAGGCGTCGAAA    | NM_198130.1 | 97 bp                 |
| <b>TRIF</b>                    | S: GACTAGAAGTCAGCCTCGCC<br>AS: GCCGGTGGAGTGTAACGTAT    | XM_08757917 | 70 bp                 |
| <b>TRAF6</b>                   | S: CGCCAAAATGGAAACGCAGA<br>AS: TGCTTCCATCTCGGCAACTT    | NM_01107754 | 88 bp                 |
| <b>FADD</b>                    | S: TGAGGCCAAGATTGATGGCA<br>AS: GAGGCGTTCTCCTTCTCGAC    | NM_152937.2 | 105 bp                |
| <b>IRAK1</b>                   | S: CTCTCCCCAGTTTTCCAGG<br>AS: GAGGAGGGGGCTGAAGATTG     | NM_01127555 | 107 bp                |
| <b>IRAK2</b>                   | S: ACATCTACCAGTGCCGTCC<br>AS: TCCCACTCACTGAGCGTGTC     | NM_01025422 | 70 bp                 |
| <b>IRAK4</b>                   | S: CCAGTCCAGGCCATCAAAGT<br>AS: CCGATAGACACAGGTCGCTC    | NM_01106791 | 122 bp                |

|               |                                                           |             |        |
|---------------|-----------------------------------------------------------|-------------|--------|
| <b>IRF3</b>   | S: GATGAGGGGTCCTCAGACCT<br>AS: TGCTGGGTTTGGGAAGTTGT       | NM_0100699  | 87 bp  |
| <b>NFKB2</b>  | S: ATGCCGGAGAATGAAGAGCC<br>AS: AGCGTTCAACAGCAGGGTC        | NM_00100834 | 162 bp |
| <b>RPL37a</b> | S:CGCTAAGTACACTTGCTCCTTCTG<br>AS: GCCACTGTTTTTCATGCAGGAAC | NM_00120531 | 91 bp  |
| <b>CyB</b>    | S: CTCCGTGGCCAACGATAAGA<br>AS: AGGTCACCTCGTCCTACAGGT      | NM_022536.2 | 95 bp  |
| <b>HPRT1</b>  | S: GCGAAAGTGGAAAAGCCAAGT<br>AS:GCCACATCAACAGGACTCTTTAG    | NM_012583.2 | 98 bp  |

### Full length Blots (Western Blot Figure 8)

#### Ponceau Staining

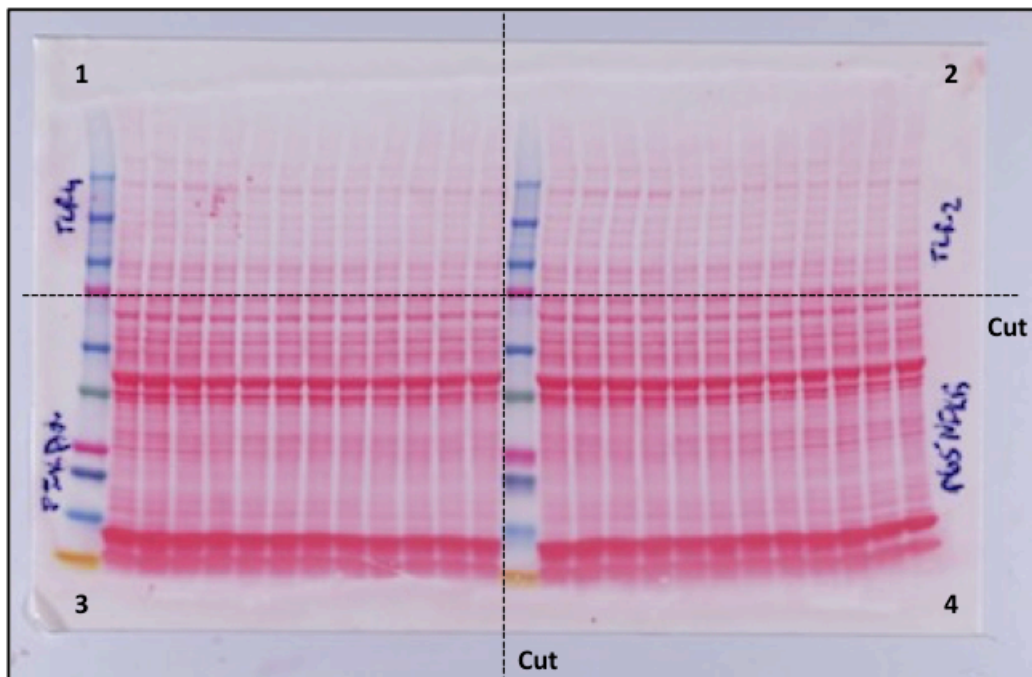

Membrane was cropped in four membranes in order to incubate with the specific antibodies. For NFKB and IKBa, membranes 3 and 4 were stripped and incubated with the specific antibodies.



TLR4

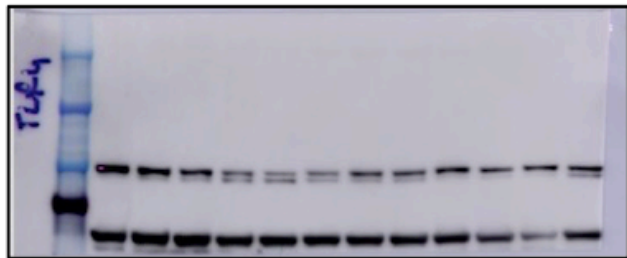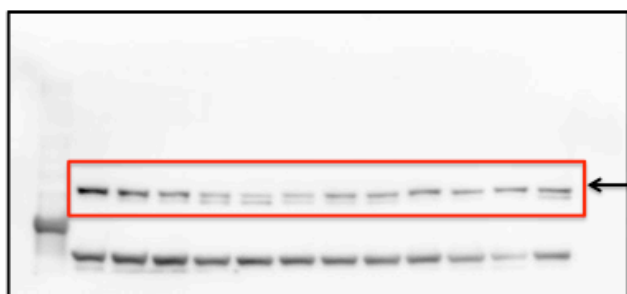

Figure Image (Cropped)  
TLR4 (95 kDa)

TLR2

Lower exposure

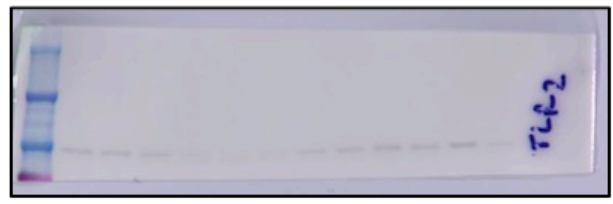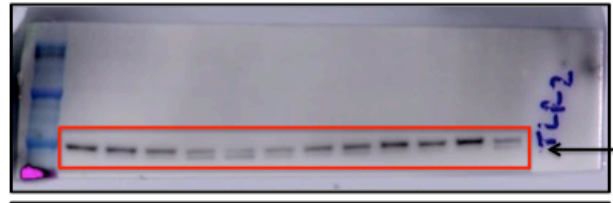

Figure Image  
(Cropped)  
TLR2 (90 kDa)

Overexposure

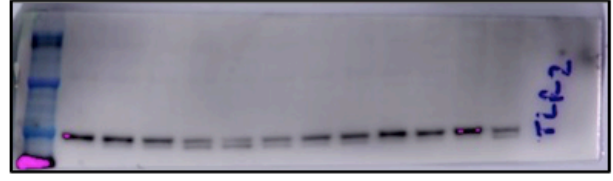

**pIKB $\alpha$ /IKB $\alpha$**

Lower exposure

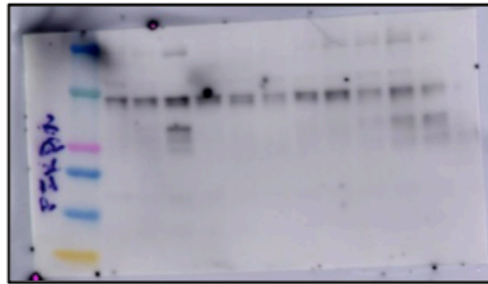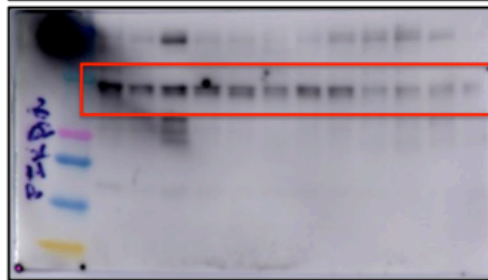

← Figure Image (Cropped)  
phospho-IKB $\alpha$  (40 kDa)

Overexposure

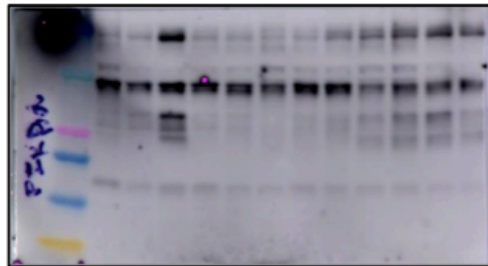

Lower exposure

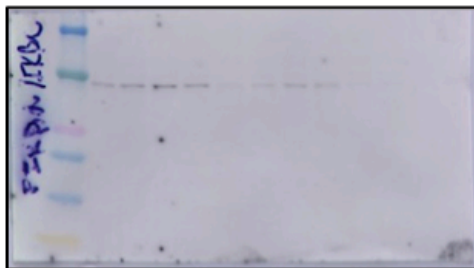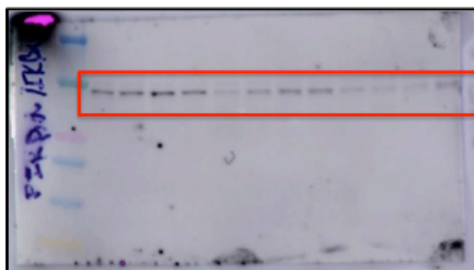

← Figure Image (Cropped)  
IKB $\alpha$  (40 kDa)

Overexposure

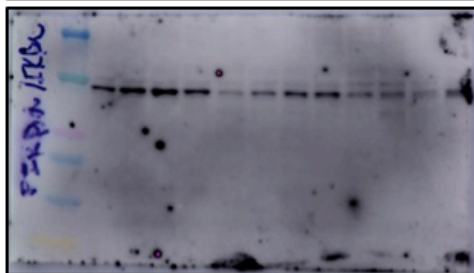

**pNFκB/NFκB**

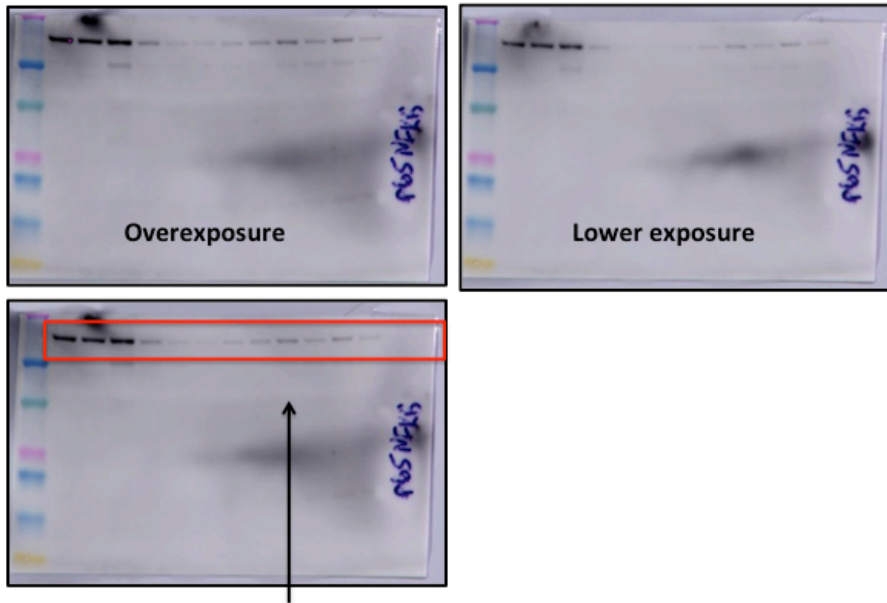

Figure Image (Cropped)  
Phospho-NFκB (65 kDa)

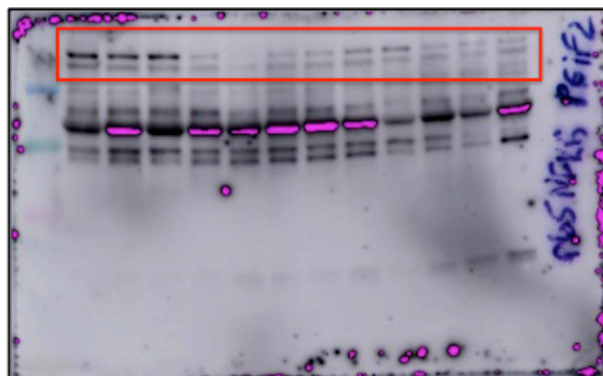

Figure Image  
(Cropped)  
NFκB (65 kDa)

## Caspase 3

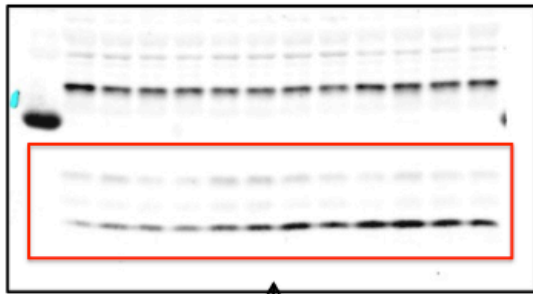

Figure Image (Cropped)  
Cleaved Caspase 3 (19, 17 kDa)

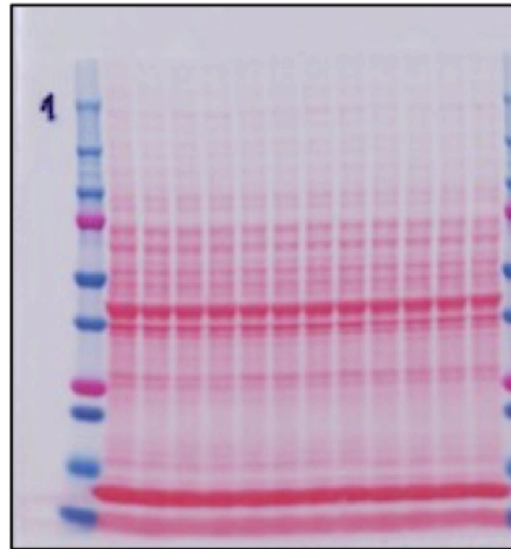

Supplement: 41598_2018_35809_MOESM1_ESM.pdf [file 41598_2018_35809_MOESM1_ESM.pdf]
